# Supplementary material for: Serum CA242: a biomarker for diagnosis, progression, and metastasis in multiple tumors
Source: Research Square preprint supplement (doi:10.21203/rs.3.rs-39787/v2), 2020-10-12
Supplement: Supplementary file 1 [file 0fe9f49353fcf6c176d11b02.docx]

|  | **ROC** | |  |  |  |  |  |
| --- | --- | --- | --- | --- | --- | --- | --- |
|  | **AUC(95% CI)** | **P value** | **Cut off** | **Sensitivity(95% CI)** | **Specificity(95% CI)** | **positive LR** | **negative LR** |
| Colorectal |  |  |  |  |  |  |  |
| NM vs LNM | 0.6422(0.6151，0.6693) | <0.0001 | > 9.025 | 0.5952（0.5507,0.6386） | 0.6237（0.6061,0.6411） | 1.582 | 0.64903 |
| NM vs DM | 0.7107(0.6906 , 0.7308) | <0.0001 | > 16.96 | 0.4995(0.468 , 0.531) | 0.8411(0.8275 , 0.8541) | 3.144 | 0.595054 |
| Periampullary carcinoma |  |  |  |  |  |  |  |
| NM vs LNM | 0.7143(0.5344 , 0.8942) | 0.0513 | > 6.88 | 0.875(0.4735 , 0.9968) | 0.5179(0.3803 , 0.6534) | 1.815 | 0.241359 |
| NM vs DM | 0.7021(0.5563 , 0.8479) | 0.0088 | > 7.76 | 0.8421(0.6042 , 0.9662) | 0.5536(0.4147 , 0.6866) | 1.886 | 0.285224 |
| Endometrial cancer |  |  |  |  |  |  |  |
| NM vs LNM | 0.7907(0.7073 , 0.8741) | <0.0001 | > 11.16 | 0.7407(0.5372 , 0.8889) | 0.7814(0.7375 , 0.821) | 3.389 | 0.33184 |
| NM vs DM | 0.6387(0.4429 , 0.8344) | 0.0887 | > 11.88 | 0.6154(0.3158 , 0.8614) | 0.8065(0.7642 , 0.8442) | 3.181 | 0.476875 |
| Gallbladder carcinoma |  |  |  |  |  |  |  |
| NM vs LNM | 0.6343(0.5519,0.7168) | 0.0021 | > 79.41 | 0.4023（0.2985,0.5129） | 0.8409（0.7475,0,9102） | 2.529 | 0.710786 |
| NM vs DM | 0.7148(0.6205,0.8091) | <0.0001 | > 63.12 | 0.5476（0.3867,0.7015） | 0.7727（0.6711,0.8553） | 2.41 | 0.585479 |
| Bladder cancer |  |  |  |  |  |  |  |
| NM vs LNM | 0.5542(0.4084,0.7001) | 5384 | > 2.645 | 1（0.7151,1） | 0.2039(0.1682,0.2433) | 1.256 | 0 |
| NM vs DM | 0.71(0.609,0.811) | <0.0001 | > 9.235 | 0.5588(0.3789,0.7281) | 0.7983(0.7589,0.8338) | 2.77 | 0.552674 |
| Gastric cancer |  |  |  |  |  |  |  |
| NM vs LNM | 0.6157(0.5867 , 0.6447) | <0.0001 | > 6.625 | 0.6761(0.6312 , 0.7187) | 0.5171(0.4897 , 0.5444) | 1.4 | 0.626378 |
| NM vs DM | 0.6153(0.5726 , 0.658) | <0.0001 | > 17.05 | 0.4042(0.3415 , 0.4692) | 0.8198(0.7979 , 0.8402) | 2.243 | 0.726763 |
| Pancreatic cancer |  |  |  |  |  |  |  |
| NM vs LNM | 0.5227(0.4469 , 0.5985) | 0.57 | > 6.525 | 0.8548(0.7422 , 0.9314) | 0.2328(0.1886 , 0.2818) | 1.114 | 0.623711 |
| NM vs DM | 0.6311(0.586 , 0.6762) | <0.0001 | > 20.51 | 0.7273(0.668 , 0.7812) | 0.4836(0.4289 , 0.5385) | 1.408 | 0.563896 |
| Lung cancer |  |  |  |  |  |  |  |
| NM vs LNM | 0.5331(0.517 , 0.5492) | <0.0001 | > 11.48 | 0.2511(0.2325 , 0.2704) | 0.8005(0.786 , 0.8145) | 1.259 | 0.93554 |
| NM vs DM | 0.6411(0.6262 , 0.6559) | <0.0001 | > 11.01 | 0.4317(0.4117 , 0.4519) | 0.7857(0.7708 , 0.8) | 2.014 | 0.723304 |
| Cervical cancer |  |  |  |  |  |  |  |
| NM vs LNM | 0.6313(0.5861 , 0.6764) | <0.0001 | > 8.2 | 0.5745(0.5004 , 0.6461) | 0.6353(0.6131 , 0.657) | 1.575 | 0.669762 |
| NM vs DM | 0.5814(0.5201 , 0.6427) | 0.0083 | > 18.38 | 0.2283(0.1472 , 0.3275) | 0.9063(0.8923 , 0.9191) | 2.436 | 0.851484 |
| Liver cancer |  |  |  |  |  |  |  |
| NM vs LNM | 0.59(0.5604 , 0.6196) | <0.0001 | > 5.615 | 0.5867(0.5396 , 0.6326) | 0.5685(0.5518 , 0.5851) | 1.36 | 0.727001 |
| NM vs DM | 0.6192(0.5907 , 0.6477) | <0.0001 | > 9.175 | 0.4257(0.3796 , 0.4728) | 0.767(0.7525 , 0.781) | 1.827 | 0.748761 |
| Cholangiocarcinoma |  |  |  |  |  |  |  |
| NM vs LNM | 0.6551(0.5955 , 0.7147) | <0.0001 | > 59.71 | 0.5474(0.4419 , 0.6498) | 0.7359(0.7014 , 0.7684) | 2.073 | 0.615029 |
| NM vs DM | 0.5916(0.5221 , 0.6611) | 0.0126 | > 6.525 | 0.8548(0.7422 , 0.9314) | 0.2328(0.1886 , 0.2818) | 1.114 | 0.623711 |
| Craniofacial malignant tumour |  |  |  |  |  |  |  |
| NM vs LNM | 0.5844(0.5218 , 0.647) | 0.0082 | > 7.645 | 0.5126(0.4193 , 0.6053) | 0.645(0.5838 , 0.703) | 1.444 | 0.755659 |
| NM vs DM | 0.5169(0.3555 , 0.6783) | 0.8313 | < 0.76 | 0.1429(0.01779 , 0.4281) | 0.9924(0.9727 , 0.9991) | 18.71 | 0.863664 |
| Breast cancer |  |  |  |  |  |  |  |
| NM vs LNM | 0.5666(0.5385 , 0.5946) | <0.0001 | > 4.395 | 0.7599(0.7179 , 0.7985) | 0.344(0.3265 , 0.3618) | 1.158 | 0.697965 |
| NM vs DM | 0.5982(0.5705 , 0.6258) | <0.0001 | > 8.405 | 0.4782(0.4348 , 0.5218) | 0.6834(0.666 , 0.7005) | 1.511 | 0.763535 |
| Esophagus cancer |  |  |  |  |  |  |  |
| NM vs LNM | 0.5665(0.5189 , 0.614) | 0.0055 | > 5.545 | 0.5799(0.5017 , 0.6553) | 0.5658(0.5349 , 0.5962) | 1.335 | 0.742489 |
| NM vs DM | 0.5569(0.4993 , 0.6145) | 0.0375 | > 8.86 | 0.352(0.2687 , 0.4425) | 0.7805(0.754 , 0.8054) | 1.603 | 0.830237 |
| Ovarian cancer |  |  |  |  |  |  |  |
| NM vs LNM | 0.586(0.5312，0.6408) | 0.0067 | > 4.645 | 0.8854（0.8042,0.9414） | 0.3035(0.267,0.3419) | 1.271 | 0.377595 |
| NM vs DM | 0.6006(0.5407，0.6604) | 0.0011 | > 14.84 | 0.4608(0.3616,0.5623) | 0.7297(0.6923,0.7648) | 1.705 | 0.738934 |
